# Supplementary material
Source: publisher figshare collection journal article supplement (https://gsajournals.figshare.com/ndownloader/files/21385092)
Supplement: Supplementary file 1 [file 21385092]

## Sheet: plasmids
Table S1
Plasmid	Description	Source
pAGT100	NatMX	Kaufmann and Philippsen, 2009
pCUG6	KanMX flanked by LoxP	Pribylova et al., 2007
pFA6a-KanMX	KanMX	Bahler et al., 1998
pGBN19	KlLAC4 integrating vector	Read et al., 2007
pJJ958	Cre Recombinase	Heinisch et al., 2010
pJJH955L	LEU2 flanked by LoxP	Heinisch et al., 2010
pKT128	yEGFP	Sheff and Thorn, 2004
yEpGAP-cherry-MCS	yEmRFP	Keppler-Ross et al., 2008
pLR522	3x-HA tag and URA3	Hanner and Rusche, 2017
pLR730	KlSIR2	Froyd and Rusche, 2011
pLR809	sir2Δ::NatMX cassette	this study
pLR1076	pGBN19 lacking MFα1 leader	this study
pLR1085	yEmRFP in pGBN19	this study
pLR1087	yEGFP in pGBN19	this study
